# Supplementary material for: Walking Bout Detection for People Living in Long Residential Care: A Computationally Efficient Algorithm for a 3-Axis Accelerometer on the Lower Back
Source: MDPI journal article supplement (doi:10.3390/s23218973), 2023-11-04
Supplement: s1 [file s1]

Table S4: Individual results of the walking “reference” walking bout detection algorithm from Hickey et al.

| Participant        | Sensitivity | Specificity | Precision | Negative Predictive Value | Accuracy | F1   |
|--------------------|-------------|-------------|-----------|---------------------------|----------|------|
| 1                  | 0.85        | 0.87        | 0.93      | 0.72                      | 0.85     | 0.89 |
| 2                  | 0.97        | 0.91        | 0.96      | 0.93                      | 0.95     | 0.96 |
| 3                  | 0.93        | 0.72        | 0.72      | 0.93                      | 0.81     | 0.82 |
| 4                  | 0.74        | 0.86        | 0.89      | 0.66                      | 0.78     | 0.81 |
| 5                  | 0.98        | 0.71        | 0.78      | 0.97                      | 0.85     | 0.87 |
| 6                  | 0.76        | 0.86        | 0.85      | 0.78                      | 0.81     | 0.80 |
| 7                  | 0.57        | 0.58        | 0.53      | 0.61                      | 0.58     | 0.55 |
| 8                  | 0.88        | 0.80        | 0.82      | 0.86                      | 0.84     | 0.85 |
| 9                  | 0.94        | 0.84        | 0.88      | 0.91                      | 0.89     | 0.91 |
| 10                 | 0.93        | 0.69        | 0.87      | 0.81                      | 0.85     | 0.90 |
| 11                 | 0.88        | 0.65        | 0.87      | 0.69                      | 0.82     | 0.88 |
| 12                 | 0.77        | 0.84        | 0.93      | 0.57                      | 0.79     | 0.84 |
| 13                 | 0.92        | 0.69        | 0.65      | 0.93                      | 0.78     | 0.76 |
| 14                 | 0.97        | 0.62        | 0.77      | 0.94                      | 0.82     | 0.86 |
| 15                 | 1.00        | 0.88        | 0.94      | 1.00                      | 0.96     | 0.97 |
| 16                 | 0.99        | 0.97        | 0.98      | 0.98                      | 0.98     | 0.98 |
| 17                 | 0.87        | 0.96        | 0.97      | 0.81                      | 0.90     | 0.92 |
| 18                 | 0.97        | 0.90        | 0.94      | 0.95                      | 0.94     | 0.96 |
| 19                 | 0.98        | 0.90        | 0.92      | 0.98                      | 0.94     | 0.95 |
| 20                 | 0.97        | 0.87        | 0.88      | 0.97                      | 0.92     | 0.92 |
| 21                 | 0.99        | 0.90        | 0.96      | 0.97                      | 0.96     | 0.97 |
| Average            | 0.90        | 0.81        | 0.86      | 0.86                      | 0.86     | 0.87 |
| Standard deviation | 0.11        | 0.11        | 0.11      | 0.13                      | 0.09     | 0.10 |
