# Supplementary material for: Walking Bout Detection for People Living in Long Residential Care: A Computationally Efficient Algorithm for a 3-Axis Accelerometer on the Lower Back
Source: MDPI journal article supplement (doi:10.3390/s23218973), 2023-11-04
Supplement: s1 [file s1]

Table S1: Data collection form used by research assistants to label and time activities during the experimental protocol.

|                                                                                       |                                        |                                                                                                                                                                                                                                                                                                                                                                                                                    |                                                                                                                                                                                                                                                                                                                                                       |
|---------------------------------------------------------------------------------------|----------------------------------------|--------------------------------------------------------------------------------------------------------------------------------------------------------------------------------------------------------------------------------------------------------------------------------------------------------------------------------------------------------------------------------------------------------------------|-------------------------------------------------------------------------------------------------------------------------------------------------------------------------------------------------------------------------------------------------------------------------------------------------------------------------------------------------------|
| <b>Test Date</b>                                                                      |                                        |                                                                                                                                                                                                                                                                                                                                                                                                                    |                                                                                                                                                                                                                                                                                                                                                       |
| <b>Accelerometer #</b>                                                                |                                        |                                                                                                                                                                                                                                                                                                                                                                                                                    |                                                                                                                                                                                                                                                                                                                                                       |
| <b>Participant ID</b><br>ID Format: NZE_Facility_Participant ID_OBS<br>NZE_XX_XXX_OBS |                                        |                                                                                                                                                                                                                                                                                                                                                                                                                    |                                                                                                                                                                                                                                                                                                                                                       |
| <b>Walking aid used (tick which applies)</b>                                          |                                        | <input type="checkbox"/> Walking frame <input type="checkbox"/> High walking frame<br><input type="checkbox"/> Walking stick right hand <input type="checkbox"/> Walking stick left hand<br><input type="checkbox"/> None                                                                                                                                                                                          |                                                                                                                                                                                                                                                                                                                                                       |
| <b>Date of Birth</b>                                                                  |                                        |                                                                                                                                                                                                                                                                                                                                                                                                                    |                                                                                                                                                                                                                                                                                                                                                       |
| <b>Accelerometer height (metres)</b>                                                  |                                        |                                                                                                                                                                                                                                                                                                                                                                                                                    |                                                                                                                                                                                                                                                                                                                                                       |
| <b>Participant height</b>                                                             |                                        |                                                                                                                                                                                                                                                                                                                                                                                                                    |                                                                                                                                                                                                                                                                                                                                                       |
| <b>Participant weight</b>                                                             |                                        |                                                                                                                                                                                                                                                                                                                                                                                                                    |                                                                                                                                                                                                                                                                                                                                                       |
| <b>Test Start time (Hr:mm:ss) – from the video</b>                                    | <b>Start time for each <u>item</u></b> | <b>Activity – (number the activity in order e.g.,1,2,3) . Not all activities need to occur in each area of the home</b>                                                                                                                                                                                                                                                                                            | <b>Notes- tick any item that applies</b>                                                                                                                                                                                                                                                                                                              |
| <b>BEDROOM</b>                                                                        |                                        | <input type="checkbox"/> Transition – stand to sit<br><input type="checkbox"/> Transition – sit to stand<br><input type="checkbox"/> Sitting<br><input type="checkbox"/> Standing<br><input type="checkbox"/> Moving in bedroom/ confined space<br><input type="checkbox"/> Transition – stand to lying<br><input type="checkbox"/> Transition- lying to sit<br><input type="checkbox"/> Transition – sit to stand | <input type="checkbox"/> Had additional help from a person<br><input type="checkbox"/> Stopped during walking<br><input type="checkbox"/> Stopped during transfer<br><input type="checkbox"/> Negotiating an object while walking<br><input type="checkbox"/> Picking something off a table or similar<br><input type="checkbox"/> Other (state)_____ |
| <b>CORRIDOR</b>                                                                       |                                        | <input type="checkbox"/> Moving in corridor<br><input type="checkbox"/> Transition – stand to sit<br><input type="checkbox"/> Sitting<br><input type="checkbox"/> Transition- sit to stand<br><input type="checkbox"/> Moving in corridor                                                                                                                                                                          | <input type="checkbox"/> Had additional help from a person<br><input type="checkbox"/> Stopped during walking 3s<br><input type="checkbox"/> Stopped during transfer<br><input type="checkbox"/> Negotiating an object while walking                                                                                                                  |

|                      |  |                                                                                                                                                                                                                                                                                                                   |                                                                                                                                                                                                                                                                                                                                                                                                 |
|----------------------|--|-------------------------------------------------------------------------------------------------------------------------------------------------------------------------------------------------------------------------------------------------------------------------------------------------------------------|-------------------------------------------------------------------------------------------------------------------------------------------------------------------------------------------------------------------------------------------------------------------------------------------------------------------------------------------------------------------------------------------------|
|                      |  |                                                                                                                                                                                                                                                                                                                   | <input type="checkbox"/> <i>Picking something off a table or similar</i><br><input type="checkbox"/> <i>Other (state)_____</i>                                                                                                                                                                                                                                                                  |
| <b>LOUNGE/DINING</b> |  | <input type="checkbox"/> Moving around lounge/dining area<br><input type="checkbox"/> Transition – stand to sit<br><input type="checkbox"/> Sitting<br><input type="checkbox"/> Transition – sit to stand<br><input type="checkbox"/> Standing still<br><input type="checkbox"/> Moving around lounge/dining area | <input type="checkbox"/> <i>Had additional help from a person</i><br><input type="checkbox"/> <i>Stopped during walking</i><br><input type="checkbox"/> <i>Stopped during transfer</i><br><input type="checkbox"/> <i>Negotiating an object while walking</i><br><input type="checkbox"/> <i>Picking something off a table or similar</i><br><i>Other (state)_____</i>                          |
| <b>CORRIDOR</b>      |  | <input type="checkbox"/> Moving in corridor<br><input type="checkbox"/> Transition – stand to sit<br><input type="checkbox"/> Sitting<br><input type="checkbox"/> Transition- sit to stand<br><input type="checkbox"/> Moving in corridor                                                                         | <input type="checkbox"/> <i>Had additional help from a person</i><br><input type="checkbox"/> <i>Stopped during walking</i><br><input type="checkbox"/> <i>Stopped during transfer</i><br><input type="checkbox"/> <i>Negotiating an object while walking</i><br><input type="checkbox"/> <i>Picking something off a table or similar</i><br><input type="checkbox"/> <i>Other (state)_____</i> |
| <b>BEDROOM</b>       |  | <input type="checkbox"/> Transition – moving in bedroom/ confined space<br><input type="checkbox"/> Standing still<br><input type="checkbox"/> Transition – stand to sit<br><input type="checkbox"/> Sitting<br><br><b>FINISH TIME</b>                                                                            | <input type="checkbox"/> <i>Had additional help from a person</i><br><input type="checkbox"/> <i>Stopped during walking</i><br><input type="checkbox"/> <i>Stopped during transfer</i><br><input type="checkbox"/> <i>Negotiating an object while walking</i><br><input type="checkbox"/> <i>Picking something off a table or similar</i><br><input type="checkbox"/> <i>Other (state)_____</i> |
