# Supplementary material for: Walking Bout Detection for People Living in Long Residential Care: A Computationally Efficient Algorithm for a 3-Axis Accelerometer on the Lower Back
Source: MDPI journal article supplement (doi:10.3390/s23218973), 2023-11-04
Supplement: s1 [file s1]

Table S2: Individual results of the developed generic algorithm.

| Participant        | Sensitivity | Specificity | Precision | Negative Predictive Value | Accuracy | F1   |
|--------------------|-------------|-------------|-----------|---------------------------|----------|------|
| 1                  | 0.82        | 0.84        | 0.92      | 0.69                      | 0.83     | 0.87 |
| 2                  | 0.98        | 0.82        | 0.92      | 0.94                      | 0.92     | 0.95 |
| 3                  | 0.95        | 0.76        | 0.76      | 0.95                      | 0.85     | 0.84 |
| 4                  | 0.76        | 0.72        | 0.82      | 0.65                      | 0.75     | 0.79 |
| 5                  | 0.99        | 0.67        | 0.76      | 0.98                      | 0.83     | 0.86 |
| 6                  | 0.78        | 0.66        | 0.70      | 0.75                      | 0.72     | 0.73 |
| 7                  | 0.71        | 0.52        | 0.56      | 0.68                      | 0.61     | 0.62 |
| 8                  | 0.87        | 0.64        | 0.73      | 0.82                      | 0.76     | 0.79 |
| 9                  | 0.92        | 0.77        | 0.84      | 0.89                      | 0.86     | 0.88 |
| 10                 | 0.92        | 0.57        | 0.83      | 0.76                      | 0.81     | 0.87 |
| 11                 | 0.95        | 0.56        | 0.85      | 0.81                      | 0.84     | 0.90 |
| 12                 | 0.84        | 0.78        | 0.91      | 0.63                      | 0.82     | 0.87 |
| 13                 | 0.86        | 0.71        | 0.65      | 0.89                      | 0.77     | 0.74 |
| 14                 | 0.96        | 0.56        | 0.74      | 0.92                      | 0.79     | 0.84 |
| 15                 | 1.00        | 0.83        | 0.92      | 1.00                      | 0.94     | 0.96 |
| 16                 | 0.97        | 0.87        | 0.93      | 0.94                      | 0.93     | 0.95 |
| 17                 | 0.88        | 0.90        | 0.94      | 0.82                      | 0.89     | 0.91 |
| 18                 | 0.94        | 0.90        | 0.94      | 0.90                      | 0.93     | 0.94 |
| 19                 | 0.97        | 0.84        | 0.88      | 0.96                      | 0.91     | 0.92 |
| 20                 | 0.96        | 0.87        | 0.88      | 0.96                      | 0.92     | 0.92 |
| 21                 | 0.00        | 0.88        | 0.00      | 0.28                      | 0.27     | 0.00 |
| Average            | 0.86        | 0.75        | 0.78      | 0.82                      | 0.81     | 0.82 |
| Standard deviation | 0.21        | 0.12        | 0.21      | 0.17                      | 0.15     | 0.20 |
